# Supplementary material for: Michael addition of α-nitro ketones to conjugated enones under solventless conditions using silica
Source: Royal Society of Chemistry journal article supplement (doi:10.1039/b306359c), 2003-01-01
Supplement: b306359c.doc [file b306359c.doc]

# Supplementary data

**3aa.** Yield 87%; oil; IR (cm-1, neat) 1358, 1553, 1598, 1693, 3060; 1H NMR  (ppm) 2.19 (s, 3H), 2.47 (q, 2H, *J* = 6.5 Hz), 2.70 (dt, 2H, *J* = 5.5, 1.8 Hz ), 6.33 (t, 1H, *J* = 7.0 Hz), 7.51-7.77 (m, 3H), 8.08-8.17 (m, 2H). 13C NMR (ppm) 24.8, 30.2, 38.8, 89.1, 129.3, 129.4, 133.7, 135.1, 189.6, 207.5. EI-MS: *m/z* = 105 (100), 91, 77, 43. Anal. Calcd for C12H13NO4 (235.23): C, 61.27; H, 5.57; N, 5.95. Found: C, 61.38; H, 5.64; N, 5.88.

**3ba.** Yield 77%; oil; IR (cm-1, neat) 1355, 1542, 1716; 1H NMR  (ppm) 1.69 (s, 3H), 2.37 (s, 3H), 2.43 (s, 3H), 2.30-2.51 (m, 4H). 13C NMR (ppm) 20.9, 24.7, 29.5, 30.1, 37.7, 96.8, 199.4, 206.0. EI-MS: *m/z* = 115, 98, 43 (100). Anal. Calcd for C8H13NO4 (187.19): C, 51.33; H, 7.00; N, 7.48. Found: C, 51.40; H, 6.96; N, 7.55.

**3ca.** Yield 74%; oil; IR (cm-1, neat) 1357, 1543, 1718; 1H NMR  (ppm) 0.87 (t, 3H, *J* = 7.6 Hz), 2.11-2.30 (m, 9H), 2.41 (s, 3H). 13C NMR (ppm) 8.0, 25.5, 26.2, 27.2, 30.2, 37.6, 100.4, 199.4, 205.9. EI-MS: *m/z* = 155, 112, 97, 43 (100), 29. Anal. Calcd for C9H15NO4 (201.22): C, 53.72; H, 7.51; N, 6.96. Found: C, 53.60; H, 7.62; N, 6.87.

**3da.** Yield 86%; oil; IR (cm-1, neat) 1356, 1542, 1720; 1H NMR  (ppm) 0.89 (t, 3H, *J* = 7.3 Hz), 1.00-1.58 (m, 10H), 1.60-1.80 (m, 6H), 1.92-2.59 (m, 5H), 2.13 (s, 3H).13C NMR (ppm) 13.9, 22.8, 25.4, 25.5, 25.6, 26.3, 30.2, 30.6, 30.7, 32.9, 37.7, 46.7, 100.6, 205.1, 205.9. EI-MS: *m/z* = 157, 140, 111, 97, 83 (100), 55, 43. Anal. Calcd for C16H27NO4 (297.39): C, 64.62; H, 9.15; N, 4.71. Found: C, 64.74; H, 8.99; N, 4.78.

**3ea diastereomeric mixture.** Yield 88%; oil; IR (cm-1, neat) 1353, 1541, 1721; 1H NMR  (ppm) 0.86 (t, 3H, *J* = 7.0 Hz), 1.07 (d, 1.5H, *J* = 2.2 Hz), 1.10 (d, 1.5H, *J* = 2.2 Hz), 1.12-1.64 (m, 4H), 1.66(s, 1.5H), 1.69 (s, 1.5H), 2.16 (s, 3H), 2.22-2.56 (m, 4H), 2.62-2.83 (m, 1H).13C NMR (ppm) 14.1, 18.5, 18.8, 20.4, 20.5, 20.6, 20.7, 29.4, 29.6, 30.2, 36.5, 36.9, 37.8, 37.9, 41.0, 41.2, 97.4, 97.5, 206.0, 206.2. EI-MS: *m/z* = 98, 71, 43 (100), 29. Anal. Calcd for C12H21NO4 (243.30): C, 59.24; H, 8.70; N, 5.76. Found: C, 59.38; H, 8.59; N, 5.65.

**3fb.** Yield 72%; oil; IR (cm-1, neat) 1351, 1538, 1723; 1H NMR  (ppm) 0.92 (t, 3H, *J* = 7.0 Hz), 1.02 (t, 3H, *J* = 7.3 Hz), 1.06 (d, 3H, *J* = 3.3 Hz), 1.09 (d, 3H, *J* = 3.3 Hz), 1.10-1.25 (m, 2H), 1.92-2.04 (m, 1H), 2.20-2.43 (m, 1H), 2.48-2.52 (m, 6H), 2.71-2.83 (m, 1H).13C NMR (ppm) 7.9, 14.1, 16.9, 20.7, 20.8, 26.5, 35.2, 36.2, 36.3, 36.4, 100.6, 206.4, 208.7. EI-MS: *m/z* = 211, 129, 112 (100), 99, 71, 57, 43, 29. Anal. Calcd for C13H23NO4 (257.33): C, 60.68; H, 9.01; N, 5.44. Found: C, 60.81; H, 8.89; N, 5.33.

**3gb.** Yield 76%; oil; IR (cm-1, neat) 1359, 1538, 1604, 1715, 3030; 1H NMR  (ppm) 0.75 (t, 3H, *J* = 7.3 Hz), 0.98 (t, 3H, *J* = 7.3 Hz), 1.92-2.39 (m, 8H), 2.71-2.97 (m, 4H), 7.08-7.16 (m, 5H).13C NMR (ppm) 7.7, 7.8, 26.0, 27.0, 29.6, 35.8, 35.9, 39.3, 100.5, 126.5, 128.5, 128.6, 140.2, 201.0, 208.6. EI-MS: *m/z* = 143, 126, 105, 91 (100), 77, 55, 41, 29. Anal. Calcd for C18H25NO4 (319.40): C, 67.69; H, 7.89; N, 4.39. Found: C, 67.72; H, 7.92; N, 4.30.

**3hb.** Yield 77%; oil; IR (cm-1, neat) 1349, 1542, 1718; 1H NMR  (ppm) 0.87 (t, 3H, *J* = 6.8 Hz), 1.04 (t, 3H, *J* = 7.3 Hz), 1.18-1.36 (m, 4H), 1.52-1.66 (m, 2H), 1.67 (s, 3H), 2.32-2.63 (m, 8H).13C NMR (ppm) 7.9, 14.0, 20.9, 22.5, 23.4, 29.6, 31.2, 36.1, 36.4, 36.7, 97.0, 202.0, 208.9. EI-MS: *m/z* = 211, 129, 112 (100), 99, 71, 57, 43, 29. Anal. Calcd for C13H23NO4 (257.33): C, 60.68; H, 9.01; N, 5.44. Found: C, 60.60; H, 9.14; N, 5.35.

**3ac.** Yield 86%; oil; IR (cm-1, neat) 1371, 1555, 1597, 1694, 3066; 1H NMR  (ppm) 0.90 (t, 3H, *J* = 7.3 Hz), 1.51-1.72 (m, 2H), 2.28-2.70 (m, 4H), 6.32 (t, 1H, *J* = 7.0 Hz), 7.50-7.74 (m, 3H), 8.06-8.16 (m, 2H).13C NMR (ppm) 13.8, 17.5, 24.8, 37.8, 44.9, 89.2, 129.3, 129.4, 133.7, 135.0, 189.6, 209.9. EI-MS: *m/z* = 105 (100), 77, 51, 43. Anal. Calcd for C14H17NO4 (263.29): C, 63.87; H, 6.51; N, 5.32. Found: C, 64.00; H, 6.39; N, 5.41.

**3cc.** Yield 65%; oil; IR (cm-1, neat) 1352, 1545, 1715; 1H NMR  (ppm) 0.84 (t, 3H, *J* = 7.0 Hz), 0.88 (t, 3H, *J* = 7.3 Hz), 1.47-1.66 (m, 2H), 2.20-2.28 (m, 5H), 2.30-2.41 (m, 6H).13C NMR (ppm) 7.9, 13.8, 17.4, 25.5, 26.2, 27.2, 36.6, 44.9, 100.5, 199.4, 208.3. EI-MS: *m/z* = 157, 140, 111, 71, 43 (100). Anal. Calcd for C11H19NO4 (229.27): C, 57.63; H, 8.35; N, 6.11. Found: C, 57.54; H, 8.51; N, 5.98.

**3ia.** Yield 75%; oil; IR (cm-1, neat) 1359, 1548, 1716; 1H NMR  (ppm) 1.56-2.88 (m, 12H), 2.16 (s, 3H). 13C NMR (ppm) 21.3, 26.5, 28.9, 29.9, 37.3, 37.6, 39.5, 96.2, 200.5, 206.0. Anal. Calcd for C10H15NO4 (213.23): C, 56.33; H, 7.09; N, 6.57. Found: C, 56.45; H, 6.9; N, 6.48.

**3ja.** Yield 82%; oil; IR (cm-1, neat) 1360, 1548, 1584, 1694, 1715, 3010; 1H NMR  (ppm) 1.04 (t, 3H, *J* = 7.3 Hz), 1.42-2.74 (m, 16H).13C NMR (ppm) 7.9, 24.8, 25.8, 29.7, 30.7, 35.6, 36.2, 36.6, 41.5, 99.1, 202.8, 209.3. EI-MS: *m/z* = 195, 166, 138, 113, 95, 81, 57 (100), 41, 29. Anal. Calcd for C12H19NO4 (241.28): C, 59.74; H, 7.94; N, 5.81. Found: C, 59.89; H, 8.05; N, 5.68.

**3ka.** Yield 88%; waxy solid; IR (cm-1, neat) 1360, 1548, 1584, 1694, 1715, 3010; 1H NMR  (ppm) 2.16 (s, 3H), 2.12-2.88 (m, 6H), 2.90-3.01 (m, 2H), 3.86 (s, 3H), 7.08 (dd, 1H, *J* = 8.0, 1.1 Hz), 7.32 (t, 1H, *J* = 8.0 Hz), 7.65 (dd, 1H, *J* = 8.0, 1.1 Hz).13C NMR (ppm) 19.9, 27.7, 30.1, 32.3, 38.2, 55.9, 93.7, 115.4, 120.2, 128.1, 131.2, 131.7, 156.9, 189.1, 206.5. EI-MS: *m/z* = 244, 186 (100), 128, 115, 77, 43. Anal. Calcd for C15H17NO5 (291.30): C, 61.85; H, 5.88; N, 4.81. Found: C, 61.99; H, 6.01; N, 4.69.
